# Supplementary material for: Unusual activation pathways of amines in the reactions with molybdenum pentachloride
Source: Royal Society of Chemistry journal article supplement (doi:10.1039/c6nj03992h), 2017-01-01

## Unusual Activation Pathways of Amines in the Reactions with Molybdenum Pentachloride

*Niccolò Bartalucci, Marco Bortoluzzi, Fabio Marchetti, Guido Pampaloni, Silvia Schoch  
and Stefano Zacchini*

### Supporting Information

| <b><u>Table of contents</u></b>                                                                                                                                                               | <i>Page</i> |
|-----------------------------------------------------------------------------------------------------------------------------------------------------------------------------------------------|-------------|
| <b>Figure S1.</b> C-PCM/ $\omega$ B97X calculated structure of $[\text{MoCl}_5(\text{C}_4\text{H}_7\text{N})]$ , <b>1</b>                                                                     | S2          |
| <b>Table S1.</b> Selected computed bond lengths ( $\text{\AA}$ ) and angles ( $^\circ$ ) for $[\text{MoCl}_5(\text{C}_4\text{H}_7\text{N})]$ , <b>1</b>                                       | S2          |
| <b>Figure S2.</b> DFT EDF2 calculated structures for $[\text{MoCl}_4(\text{NEt}_2)]$ , <b>3</b> , and relative Gibbs free energy values, referred to the $[\text{MoCl}_4(\text{NEt}_2)]$ unit | S3          |

**Figure S1.** C-PCM/ $\omega$ B97X calculated structure of  $[\text{MoCl}_5(\text{C}_4\text{H}_7\text{N})]$ , **1**. Dichloromethane as continuous medium.

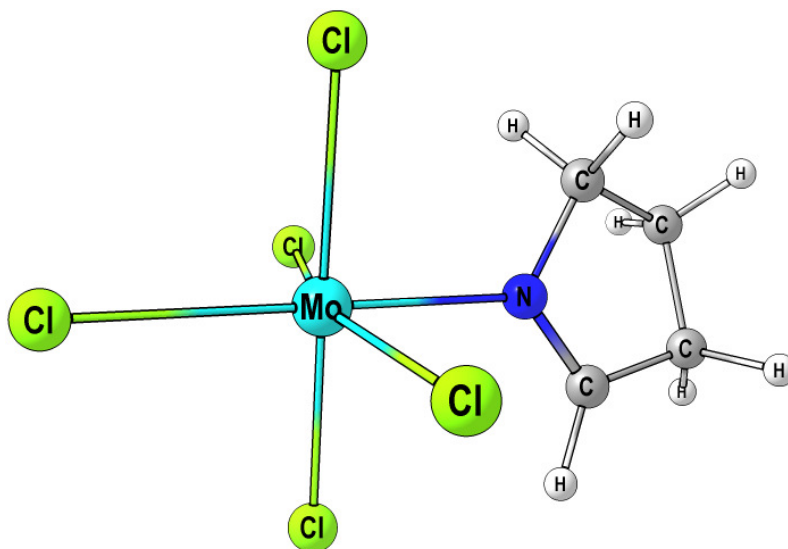

**Table S1.** Selected computed bond lengths (Å) and angles (°) for  $[\text{MoCl}_5(\text{C}_4\text{H}_7\text{N})]$ , **1**.

| Bond                        |       | Angle   |       |
|-----------------------------|-------|---------|-------|
| Mo–N                        | 2.217 | N–Mo–Cl | 178.2 |
| Mo–Cl <sub>trans to N</sub> | 2.288 |         | 80.3  |
| Mo–Cl <sub>cis to N</sub>   | 2.288 |         | 82.3  |
|                             | 2.333 |         | 89.3  |
|                             | 2.340 |         | 90.0  |
|                             | 2.384 |         |       |
| C=N                         | 1.278 |         |       |

**Figure S2.** DFT EDF2 calculated structures for  $\text{MoCl}_4(\text{NEt}_2)_2$ , **3**, and relative Gibbs free energy values, referred to the  $[\text{MoCl}_4(\text{NEt}_2)_2]$  unit ( $\text{kcal mol}^{-1}$ ).

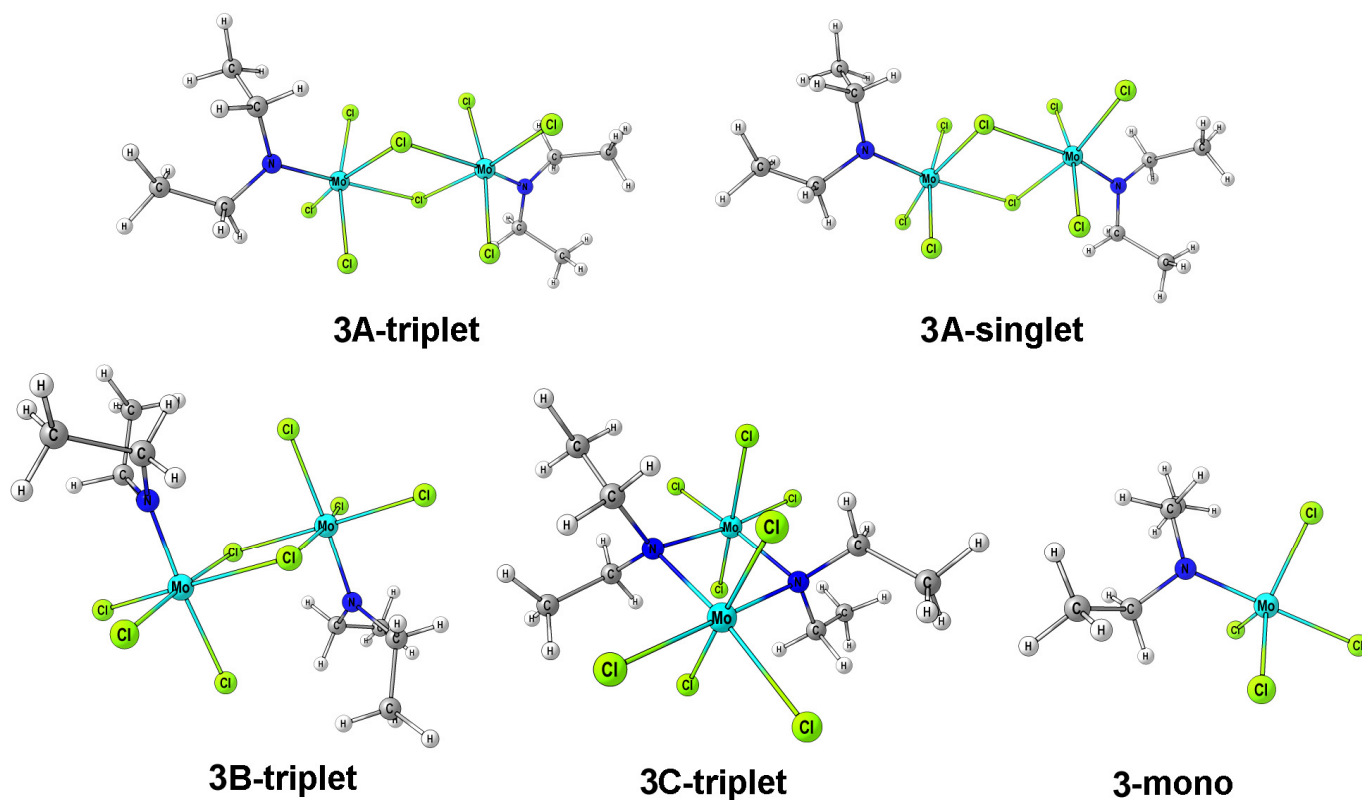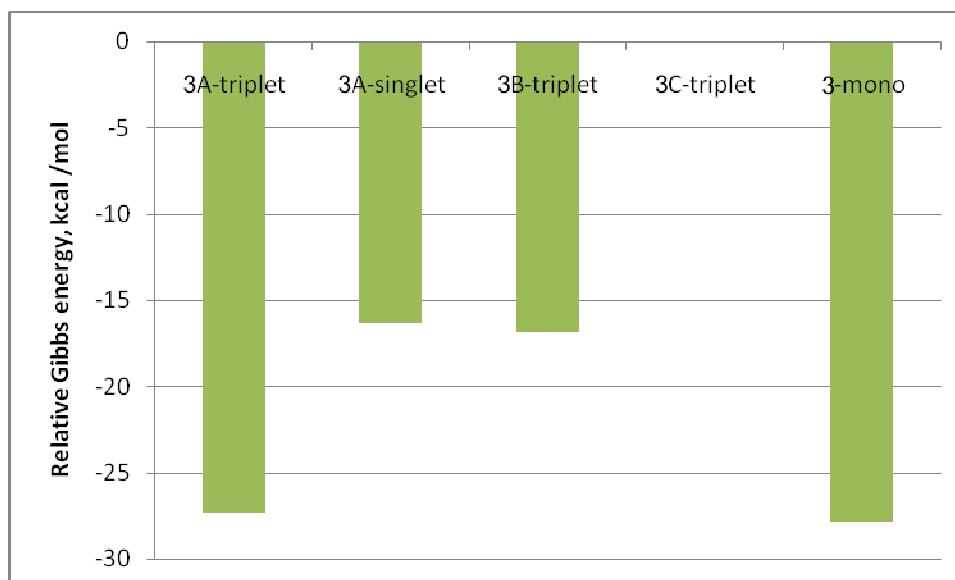

Supplement: c6nj03992h2.pdf [file c6nj03992h2.pdf]
